# Supplementary material
Source: MDPI journal article supplement (https://www.mdpi.com/2073-4441/15/6/1178)
Supplement: s1 [file s1]

Supplementary material for Babushkin *et al.*, *The “minor waterbodies” and their malacofauna. Are freshwater gastropod communities usable for habitat classification?*

**Table S3**

**Eigenvalues, the proportion of the explained variance and the achieved significance level (determined by the Monte Carlo method) for each of the CCA ordination axes**

| Axe | Eigenvalues | Explained variance, % | <i>p-level</i> |
|-----|-------------|-----------------------|----------------|
| 1   | 0.89579     | 36.78                 | 0.001          |
| 2   | 0.63142     | 25.93                 | 0.009          |
| 3   | 0.31636     | 12.99                 | 0.496          |
| 4   | 0.26888     | 11.04                 | 0.133          |
| 5   | 0.18367     | 7.542                 | 0.113          |
| 6   | 0.11526     | 4.733                 | 0.078          |
| 7   | 0.020183    | 0.8287                | 0.879          |
| 8   | 0.0038934   | 0.1599                | 0.880          |
| 9   | 8.5752E-17  | 3.521E-15             | 0.073          |

Table S4

Pearson correlation coefficients (r) between environmental variables with factor loads

(r > ±0.45 are in bold)

| Variables                                     | Axe 1            | Axe 2           |
|-----------------------------------------------|------------------|-----------------|
| Depth at sampling site                        | <b>0.775703</b>  | -0.358356       |
| Water current and its velocity                | 0.0119308        | <b>0.528349</b> |
| The content in the substrate of:              |                  |                 |
| Detritus                                      | -0.183854        | 0.0774544       |
| Silt                                          | <b>-0.664224</b> | <b>0.645261</b> |
| Sand                                          | <b>-0.473113</b> | 0.265786        |
| Clay                                          | <b>-0.455256</b> | <b>0.506972</b> |
| The percentage in the substrate of submerged: |                  |                 |
| Plants                                        | <b>0.621334</b>  | -0.416374       |
| Wood                                          | 0.0324447        | -0.0901161      |
| Forest litter                                 | 0.220843         | -0.254999       |

Table S5

**Species composition, number of specimens, proportion in the collection and occurrence of gastropods in various types of minor waterbodies of the Bolshoy Yugan river basin**

| Species         |                                | Above the lines – no. of specimens (portion in the whole collection, %); below the lines – abundance, in % |                          |                          |
|-----------------|--------------------------------|------------------------------------------------------------------------------------------------------------|--------------------------|--------------------------|
|                 |                                | Minor waterbodies                                                                                          |                          |                          |
|                 |                                | temporary                                                                                                  | madide                   | swamp                    |
| 1               | <i>Valvata confusa</i>         | <u>4(0.2)</u><br>3.6                                                                                       | –                        | –                        |
| 2               | <i>Valvata frigida</i>         | <u>155(8.4)</u><br>10.7                                                                                    | –                        | <u>22(1.2)</u><br>9.1    |
| 3               | <i>Valvata sibirica</i>        | <u>26(1.4)</u><br>14.3                                                                                     | –                        | <u>151(8.2)</u><br>27.3  |
| 4               | <i>Acroloxus lacustris</i>     | <u>1(0.1)</u><br>3.6                                                                                       | –                        | –                        |
| 5               | <i>Stagnicola saridalensis</i> | <u>9(0.5)</u><br>7.1                                                                                       | –                        | –                        |
| 6               | <i>Ladislavella terebra</i>    | <u>14(0.8)</u><br>14.3                                                                                     | –                        | –                        |
| 7               | <i>Galba truncatula</i>        | <u>9(0.5)</u><br>7.1                                                                                       | <u>331(17.9)</u><br>44.4 | –                        |
| 8               | <i>Ampullaceana balthica</i>   | –                                                                                                          | <u>4(0.2)</u><br>5.6     | –                        |
| 9               | <i>Ampullaceana fontinalis</i> | –                                                                                                          | <u>26(1.4)</u><br>13.9   | –                        |
| 10              | <i>Ampullaceana intermedia</i> | <u>3(0.2)</u><br>3.6                                                                                       | <u>221(11.9)</u><br>22.2 | –                        |
| 11              | <i>Ampullaceana lagotis</i>    | <u>1(0.1)</u><br>3.6                                                                                       | <u>147(7.9)</u><br>16.7  | –                        |
| 12              | <i>Peregriana dolgini</i>      | <u>41(2.2)</u><br>21.4                                                                                     | <u>109(5.9)</u><br>38.9  | –                        |
| 13              | <i>Aplexa hypnorum</i>         | <u>47(2.5)</u><br>21.4                                                                                     | –                        | –                        |
| 14              | <i>Bathyomphalus contortus</i> | <u>28(1.5)</u><br>10.7                                                                                     | –                        | <u>44(2.4)</u><br>27.3   |
| 15              | <i>Gyraulus acronicus</i>      | <u>5(0.3)</u><br>3.6                                                                                       | –                        | –                        |
| 16              | <i>Gyraulus borealis</i>       | <u>353(19.1)</u><br>64.3                                                                                   | <u>2(0.1)</u><br>2.8     | –                        |
| 17              | <i>Gyraulus stroemi</i>        | <u>25(1.4)</u><br>14.3                                                                                     | <u>1(0.1)</u><br>2.8     | <u>3(0.2)</u><br>9.1     |
| 18              | <i>Oxyloma</i> spp.            | <u>12(0.6)</u><br>17.9                                                                                     | <u>56(3.0)</u><br>22.2   | <u>1(0.1)</u><br>4.5     |
| In total:       |                                | <u>733(39.6)</u><br>85.7                                                                                   | <u>897(48.5)</u><br>77.8 | <u>221(11.9)</u><br>27.3 |
| Number of taxa: |                                | 16                                                                                                         | 9                        | 5                        |
